# Supplementary material
Source: MDPI journal article supplement (https://www.mdpi.com/1999-4907/14/8/1604)
Supplement: s1 [file s1]

## Supplementary Material

### Using functional traits to improve estimates of height-diameter relationships in a temperate mixed forest

Huanran Gao, Keda Cui, Klaus von Gadow, Xinjie Wang\*

\* **Correspondence:** Xinjie Wang: xinjiew@bjfu.edu.cn

#### Supplementary Tables

**Table S1.** Basic information of permanent sample plots in two zones.

| Zone             | Plot | Latitude  | Longitude  | D(cm) |       |      | H(m) |       |      | Elevation(m) | Aspect | Slope |
|------------------|------|-----------|------------|-------|-------|------|------|-------|------|--------------|--------|-------|
|                  |      |           |            | MaxD  | MeanD | MinD | MaxH | MeanH | MinH |              |        |       |
|                  |      |           |            |       |       |      |      |       |      |              |        |       |
| Training dataset |      |           |            |       |       |      |      |       |      |              |        |       |
| 1                | 1    | 43°21'37" | 130°9'49"  | 44.6  | 23.6  | 7.7  | 19.6 | 12.6  | 5.5  | 775          | 64     | 6     |
| 1                | 2    | 43°21'42" | 130°10'16" | 50.9  | 21.7  | 6.3  | 22.4 | 14.2  | 6.6  | 675          | 135    | 24    |
| 1                | 3    | 43°21'46" | 130°10'16" | 42.7  | 17.1  | 5.1  | 22.2 | 14.8  | 6.6  | 662          | 65     | 10    |

|   |    |           |            |      |      |     |      |      |     |     |     |    |
|---|----|-----------|------------|------|------|-----|------|------|-----|-----|-----|----|
| 1 | 4  | 43°21'42" | 130°10'21" | 46.5 | 23   | 5.1 | 19.5 | 11.2 | 4   | 670 | 160 | 36 |
| 1 | 5  | 43°21'46" | 130°10'21" | 52.5 | 21.4 | 7.2 | 23.5 | 12.6 | 4.3 | 670 | 75  | 18 |
| 1 | 6  | 43°21'37" | 130°10'25" | 44   | 23.2 | 7.2 | 26.1 | 13.6 | 7.3 | 633 | 192 | 5  |
| 1 | 7  | 43°21'42" | 130°10'25" | 33.7 | 12.3 | 5   | 16.5 | 9.8  | 2.9 | 662 | 50  | 12 |
| 1 | 8  | 43°21'46" | 130°10'25" | 60.8 | 19.9 | 5.3 | 22.7 | 12.4 | 4   | 658 | 110 | 20 |
| 1 | 9  | 43°21'37" | 130°10'29" | 57.4 | 22.3 | 6.6 | 21.2 | 12.4 | 6   | 622 | 101 | 28 |
| 1 | 10 | 43°21'42" | 130°10'29" | 56.7 | 19.1 | 5.9 | 28.4 | 13.8 | 5.1 | 633 | 280 | 13 |
| 1 | 11 | 43°21'46" | 130°10'29" | 45.4 | 15.6 | 5.7 | 16.4 | 8.8  | 4.5 | 640 | 125 | 35 |
| 1 | 12 | 43°21'37" | 130°9'54"  | 48.6 | 19.8 | 7.1 | 23.7 | 12.9 | 6.7 | 750 | 106 | 14 |
| 1 | 13 | 43°21'37" | 130°9'58"  | 47.2 | 14   | 5   | 23.9 | 10.6 | 4.4 | 742 | 100 | 14 |
| 1 | 14 | 43°21'42" | 130°9'58"  | 75   | 17.7 | 5.1 | 30.8 | 13.6 | 4.1 | 748 | 94  | 10 |
| 1 | 15 | 43°21'37" | 130°10'03" | 63.4 | 23.9 | 7.7 | 21.4 | 15.8 | 5.8 | 714 | 156 | 27 |
| 1 | 16 | 43°21'42" | 130°10'03" | 56.5 | 17.5 | 5.6 | 20.9 | 13.3 | 5.2 | 712 | 135 | 13 |
| 1 | 17 | 43°21'42" | 130°10'07" | 51.3 | 16.4 | 5.2 | 17.6 | 9.7  | 2.7 | 703 | 168 | 34 |
| 1 | 18 | 43°21'42" | 130°10'12" | 35.8 | 15.7 | 5.1 | 20.7 | 13.3 | 5.8 | 700 | 100 | 35 |

|   |    |           |            |      |      |      |      |      |      |     |     |    |
|---|----|-----------|------------|------|------|------|------|------|------|-----|-----|----|
| 1 | 19 | 43°21'46" | 130°10'12" | 78.5 | 18.1 | 5.3  | 22.6 | 12.9 | 4    | 710 | 115 | 10 |
| 1 | 20 | 43°21'33" | 130°9'49"  | 44.4 | 22.9 | 5.6  | 23.4 | 16.6 | 4.5  | 784 | 75  | 20 |
| 1 | 21 | 43°21'28" | 130°10'12" | 49.5 | 17   | 5.6  | 19.4 | 13.3 | 4.7  | 707 | 39  | 15 |
| 1 | 22 | 43°21'33" | 130°10'12" | 47.4 | 19.9 | 5.2  | 21.1 | 13.8 | 6.1  | 699 | 30  | 20 |
| 1 | 23 | 43°21'24" | 130°10'16" | 35.6 | 16.3 | 5.6  | 23.1 | 13.4 | 6.1  | 699 | 59  | 22 |
| 1 | 24 | 43°21'28" | 130°10'16" | 47.4 | 23   | 5.8  | 22.6 | 14.8 | 4.5  | 703 | 76  | 13 |
| 1 | 25 | 43°21'33" | 130°10'16" | 42.8 | 24   | 5.8  | 19.6 | 15   | 5.2  | 676 | 35  | 18 |
| 1 | 26 | 43°21'28" | 130°10'21" | 34.2 | 17.2 | 5.1  | 17.4 | 10.6 | 2.3  | 687 | 87  | 15 |
| 1 | 27 | 43°21'33" | 130°10'21" | 37.3 | 18.7 | 5.5  | 22.7 | 13.9 | 3.3  | 660 | 54  | 10 |
| 1 | 28 | 43°21'28" | 130°10'25" | 34.6 | 16.5 | 6.8  | 16.7 | 11.2 | 6.4  | 638 | 103 | 20 |
| 1 | 29 | 43°21'33" | 130°10'25" | 36.7 | 22.4 | 6.2  | 21.6 | 16.1 | 7.3  | 646 | 48  | 18 |
| 1 | 30 | 43°21'28" | 130°10'29" | 45.9 | 20.5 | 6.5  | 20.1 | 12.6 | 6.7  | 624 | 62  | 4  |
| 1 | 31 | 43°21'28" | 130°9'54"  | 50.3 | 15.8 | 5.5  | 23.6 | 12.9 | 3.5  | 768 | 77  | 17 |
| 1 | 32 | 43°21'19" | 130°10'29" | 49.8 | 26.5 | 5.8  | 22.3 | 15.2 | 7.1  | 626 | 70  | 4  |
| 1 | 33 | 43°21'15" | 130°10'25" | 22.6 | 22.2 | 21.7 | 16.3 | 15.2 | 14.1 | 614 | 89  | 3  |

|   |    |           |            |      |      |     |      |      |     |     |     |    |
|---|----|-----------|------------|------|------|-----|------|------|-----|-----|-----|----|
| 1 | 34 | 43°21'15" | 130°10'29" | 34.7 | 20   | 8   | 19.2 | 13.3 | 8.3 | 614 | 93  | 3  |
| 1 | 35 | 43°21'24" | 130°10'29" | 55.4 | 18.1 | 5.1 | 21.4 | 10.7 | 5.1 | 607 | 110 | 3  |
| 1 | 36 | 43°21'33" | 130°9'54"  | 39.5 | 13.9 | 5.2 | 27.8 | 15.3 | 4.2 | 760 | 83  | 16 |
| 1 | 37 | 43°21'28" | 130°9'58"  | 42   | 22.4 | 6.3 | 28.4 | 21   | 9.1 | 752 | 54  | 10 |
| 1 | 38 | 43°21'33" | 130°9'58"  | 33.2 | 10.9 | 5.4 | 18.7 | 8.9  | 4.3 | 748 | 100 | 13 |
| 1 | 39 | 43°21'28" | 130°10'03" | 37.2 | 15.1 | 5.4 | 23.2 | 12.7 | 3.1 | 711 | 56  | 11 |
| 1 | 40 | 43°21'33" | 130°10'03" | 45   | 19.3 | 5.2 | 22.1 | 13.1 | 6.5 | 722 | 35  | 20 |
| 1 | 41 | 43°21'28" | 130°10'07" | 48.7 | 18.2 | 8   | 21.6 | 12.6 | 6.7 | 719 | 84  | 18 |
| 1 | 42 | 43°21'33" | 130°10'07" | 59.8 | 20.8 | 5.2 | 21.9 | 14.5 | 4   | 715 | 35  | 21 |
| 1 | 43 | 43°20'48" | 130°9'41"  | 43   | 16.6 | 5.1 | 18.5 | 11.4 | 6   | 763 | 80  | 7  |
| 1 | 44 | 43°20'57" | 130°9'45"  | 38.9 | 18.7 | 6.9 | 18.3 | 11.4 | 5.5 | 738 | 77  | 16 |
| 1 | 45 | 43°20'48" | 130°9'49"  | 59   | 19.4 | 6.5 | 18.8 | 12   | 5.8 | 720 | 93  | 9  |
| 1 | 46 | 43°20'53" | 130°9'49"  | 51.2 | 16.9 | 5.9 | 19   | 9.9  | 4   | 732 | 163 | 39 |
| 1 | 47 | 43°21'02" | 130°9'49"  | 39.1 | 17.9 | 6.4 | 16   | 12.4 | 6.6 | 685 | 85  | 15 |
| 1 | 48 | 43°20'57" | 130°9'49'  | 52.5 | 24.3 | 7.1 | 26.2 | 16.8 | 6.2 | 720 | 65  | 12 |

|   |    |           |           |      |      |      |      |      |     |     |     |    |
|---|----|-----------|-----------|------|------|------|------|------|-----|-----|-----|----|
| 1 | 49 | 43°20'48" | 130°9'54" | 47.8 | 21.6 | 5.5  | 17.4 | 11.5 | 6.3 | 691 | 30  | 6  |
| 1 | 50 | 43°20'53" | 130°9'54" | 18.6 | 15.2 | 13.2 | 12.1 | 8.6  | 4.7 | 709 | 67  | 14 |
| 1 | 51 | 43°20'57" | 130°9'54" | 44.5 | 20.3 | 9.2  | 21.3 | 12.5 | 5.9 | 700 | 75  | 11 |
| 1 | 52 | 43°20'53" | 130°9'41" | 55.2 | 14.9 | 5.4  | 22.1 | 9.2  | 4.2 | 760 | 103 | 3  |
| 1 | 53 | 43°20'48" | 130°9'58" | 48.5 | 14.7 | 5.3  | 19.3 | 12   | 6.6 | 684 | 165 | 23 |
| 1 | 54 | 43°20'57" | 130°9'41" | 51.6 | 20.7 | 5.8  | 16.1 | 11.3 | 4.6 | 751 | 83  | 15 |
| 1 | 55 | 43°21'02" | 130°9'41" | 35.7 | 16.2 | 5    | 21.7 | 13.5 | 4.3 | 758 | 68  | 5  |
| 1 | 56 | 43°21'06" | 130°9'41" | 37   | 16.4 | 6    | 23.1 | 13.7 | 4.1 | 760 | 76  | 21 |
| 1 | 57 | 43°20'48" | 130°9'45" | 42.6 | 19.1 | 6.2  | 18.3 | 11.7 | 4.9 | 736 | 80  | 11 |
| 1 | 58 | 43°20'53" | 130°9'45" | 52.6 | 24.8 | 7.9  | 20.9 | 14.2 | 6.1 | 743 | 152 | 14 |
| 1 | 59 | 43°21'02" | 130°9'45" | 63.9 | 18.3 | 5.7  | 16.4 | 9.9  | 3.1 | 744 | 84  | 11 |
| 1 | 60 | 43°21'06" | 130°9'45" | 49.7 | 18.9 | 6.7  | 23.2 | 12.8 | 3.6 | 736 | 23  | 11 |
| 1 | 61 | 43°20'44" | 130°9'23" | 30.1 | 15.3 | 6.1  | 18.9 | 10.2 | 4.6 | 749 | 85  | 14 |
| 1 | 62 | 43°20'39" | 130°9'33" | 54.7 | 22.7 | 5.3  | 18.9 | 11.2 | 6.6 | 698 | 262 | 14 |
| 1 | 63 | 43°20'35" | 130°9'33" | 54.2 | 26.2 | 7    | 19.1 | 14   | 7.7 | 628 | 106 | 10 |

|   |    |           |           |      |      |     |      |      |     |     |     |    |
|---|----|-----------|-----------|------|------|-----|------|------|-----|-----|-----|----|
| 1 | 64 | 43°20'31" | 130°9'33" | 45.1 | 21.6 | 6.2 | 20.1 | 11.3 | 4.6 | 640 | 91  | 7  |
| 1 | 65 | 43°20'44" | 130°9'36" | 37.8 | 17   | 6   | 21.2 | 11   | 4.9 | 650 | 111 | 16 |
| 1 | 66 | 43°20'39" | 130°9'36" | 45   | 23.7 | 7.4 | 19.9 | 15.5 | 5.3 | 660 | 108 | 35 |
| 1 | 67 | 43°20'35" | 130°9'36" | 33.9 | 14.4 | 5.2 | 20.2 | 12.2 | 4.1 | 672 | 108 | 11 |
| 1 | 68 | 43°20'31" | 130°9'36" | 35.2 | 18.7 | 6.9 | 24.7 | 15.7 | 6.2 | 613 | 92  | 6  |
| 1 | 69 | 43°20'44" | 130°9'41" | 50.4 | 20.2 | 7.8 | 23.3 | 15.5 | 9.5 | 627 | 129 | 10 |
| 1 | 70 | 43°20'39" | 130°9'41" | 29   | 13.5 | 5.6 | 19.9 | 11.5 | 5.3 | 627 | 125 | 9  |
| 1 | 71 | 43°20'35" | 130°9'41" | 39   | 18.8 | 6.2 | 26.2 | 14.9 | 5.7 | 638 | 158 | 7  |
| 1 | 72 | 43°20'39" | 130°9'23" | 45.4 | 13.4 | 5.1 | 20.9 | 10.7 | 5.2 | 763 | 90  | 13 |
| 1 | 73 | 43°20'31" | 130°9'41" | 52   | 15.5 | 5.5 | 22.3 | 11.3 | 5.1 | 648 | 82  | 18 |
| 1 | 74 | 43°20'35" | 130°9'45" | 36.9 | 17.3 | 6.5 | 20.5 | 11.9 | 6.3 | 609 | 127 | 30 |
| 1 | 75 | 43°20'31" | 130°9'45" | 32   | 20   | 5.7 | 23.8 | 17.8 | 3.2 | 609 | 122 | 9  |
| 1 | 76 | 43°20'36" | 130°9'23" | 43.6 | 16.7 | 6.5 | 17.4 | 11.5 | 5.3 | 699 | 123 | 28 |
| 1 | 77 | 43°20'31" | 130°9'23" | 39.2 | 18.8 | 7.7 | 19.4 | 13   | 5.7 | 708 | 23  | 20 |
| 1 | 78 | 43°20'44" | 130°9'27" | 28.6 | 20.9 | 11  | 20.3 | 14.7 | 8   | 736 | 135 | 21 |

|   |    |           |            |      |      |      |      |      |     |     |     |    |
|---|----|-----------|------------|------|------|------|------|------|-----|-----|-----|----|
| 1 | 79 | 43°20'39" | 130°9'27"  | 38   | 15.7 | 5.4  | 21.7 | 12.1 | 6.1 | 717 | 100 | 19 |
| 1 | 80 | 43°20'35" | 130°9'27"  | 46.8 | 19.9 | 6.3  | 20.6 | 12.3 | 4.7 | 654 | 112 | 22 |
| 1 | 81 | 43°20'31" | 130°9'27"  | 42.6 | 12.3 | 5.5  | 17.5 | 9.1  | 4.1 | 670 | 105 | 23 |
| 1 | 82 | 43°20'44" | 130°9'32"  | 13.3 | 13.3 | 13.3 | 8.2  | 8.2  | 8.2 | 697 | 86  | 25 |
| 1 | 83 | 43°20'48" | 130°10'03" | 49.1 | 19.7 | 5.5  | 25.1 | 12.4 | 2   | 657 | 15  | 37 |
| 1 | 84 | 43°20'53" | 130°10'12" | 56.2 | 20.9 | 5.1  | 20.7 | 13.7 | 4.9 | 633 | 110 | 6  |
| 1 | 85 | 43°20'57" | 130°10'12" | 27.5 | 18.4 | 10.6 | 15.8 | 13.1 | 8.9 | 636 | 35  | 12 |
| 1 | 86 | 43°21'11" | 130°10'12" | 39.7 | 19.3 | 7.8  | 20.6 | 12.3 | 3.8 | 667 | 133 | 11 |
| 1 | 87 | 43°20'48" | 130°10'16" | 55   | 25.4 | 8.9  | 22.9 | 17.2 | 8.5 | 623 | 120 | 4  |
| 1 | 88 | 43°20'53" | 130°10'16" | 52.6 | 23.1 | 5.1  | 22.1 | 15.7 | 4.4 | 621 | 150 | 7  |
| 1 | 89 | 43°20'57" | 130°10'16" | 38.8 | 14.9 | 5.1  | 18.2 | 10.9 | 4.7 | 630 | 45  | 11 |
| 1 | 90 | 43°21'02" | 130°10'16" | 65   | 15.9 | 5.1  | 20.7 | 11   | 4.7 | 641 | 25  | 24 |
| 1 | 91 | 43°20'53" | 130°10'21" | 22.7 | 12.5 | 5.2  | 22.6 | 11.6 | 5.7 | 628 | 165 | 4  |
| 1 | 92 | 43°20'53" | 130°10'03" | 44.4 | 18.9 | 6.2  | 22.3 | 12.5 | 6.2 | 672 | 77  | 11 |
| 1 | 93 | 43°20'57" | 130°10'21" | 52.4 | 18.5 | 5.6  | 18.6 | 12   | 4.1 | 613 | 33  | 6  |

|   |     |           |            |      |      |      |      |      |      |     |     |    |
|---|-----|-----------|------------|------|------|------|------|------|------|-----|-----|----|
| 1 | 94  | 43°21'02" | 130°10'21" | 56.4 | 15.3 | 5.1  | 18.7 | 9.5  | 3.5  | 651 | 55  | 2  |
| 1 | 95  | 43°21'06" | 130°10'21" | 39.9 | 16   | 6.4  | 21.4 | 11.5 | 5.1  | 636 | 47  | 12 |
| 1 | 96  | 43°21'11" | 130°10'21" | 58.4 | 23.3 | 9.7  | 23.1 | 13.5 | 7.6  | 662 | 141 | 10 |
| 1 | 97  | 43°21'02" | 130°10'25" | 67.1 | 20.9 | 5.6  | 21.4 | 10.9 | 4.1  | 602 | 59  | 7  |
| 1 | 98  | 43°20'57" | 130°10'03" | 66.5 | 14.5 | 5.2  | 21.7 | 11.3 | 4.7  | 674 | 60  | 11 |
| 1 | 99  | 43°20'44" | 130°10'07" | 50.7 | 18.5 | 5.6  | 25.1 | 13.5 | 4.7  | 635 | 100 | 7  |
| 1 | 100 | 43°20'48" | 130°10'07" | 53.4 | 20.3 | 5.6  | 24   | 14   | 4.2  | 637 | 104 | 12 |
| 1 | 101 | 43°20'53" | 130°10'07" | 57.3 | 19.2 | 6.9  | 23.1 | 12.9 | 5.6  | 644 | 134 | 10 |
| 1 | 102 | 43°20'57" | 130°10'07" | 40.1 | 23.7 | 14.2 | 18.1 | 13.3 | 10.8 | 633 | 131 | 8  |
| 1 | 103 | 43°20'44" | 130°10'12" | 45.2 | 20.9 | 6.1  | 25.4 | 14.7 | 3.4  | 619 | 125 | 6  |
| 1 | 104 | 43°20'48" | 130°10'12" | 47.8 | 18.7 | 5.7  | 20.9 | 13   | 5.3  | 616 | 145 | 6  |
| 2 | 1   | 43°20'08" | 130°8'47"  | 31.7 | 20.2 | 5.6  | 22.2 | 15.4 | 4.3  | 722 | 28  | 5  |
| 2 | 2   | 43°19'59" | 130°8'38"  | 42.8 | 14.2 | 5.1  | 24.8 | 11.9 | 4.9  | 742 | 350 | 5  |
| 2 | 3   | 43°19'55" | 130°8'38"  | 56.5 | 26.1 | 6    | 20.4 | 13   | 4.1  | 749 | 49  | 7  |
| 2 | 4   | 43°20'08" | 130°8'34"  | 42.1 | 19.4 | 6.3  | 22.4 | 13.1 | 5.2  | 717 | 303 | 5  |



|   |    |           |           |      |      |     |      |      |     |     |     |    |
|---|----|-----------|-----------|------|------|-----|------|------|-----|-----|-----|----|
| 2 | 5  | 43°20'04" | 130°8'34" | 48.9 | 23.7 | 7.4 | 22.7 | 13.9 | 6.4 | 725 | 353 | 14 |
| 2 | 6  | 43°19'59" | 130°8'34" | 41.1 | 19.1 | 6.8 | 23.1 | 12.4 | 4.7 | 748 | 140 | 9  |
| 2 | 7  | 43°19'55" | 130°8'34" | 53.3 | 20   | 7   | 24.6 | 10.9 | 5.2 | 756 | 14  | 8  |
| 2 | 8  | 43°20'08" | 130°8'29" | 48.2 | 21.8 | 5.5 | 20.8 | 12.2 | 3.2 | 720 | 11  | 13 |
| 2 | 9  | 43°20'04" | 130°8'29" | 54.4 | 24.6 | 5.1 | 22.1 | 12.2 | 4.4 | 739 | 24  | 9  |
| 2 | 10 | 43°19'59" | 130°8'29" | 36   | 20.2 | 5.9 | 23.1 | 12.6 | 3   | 743 | 205 | 9  |
| 2 | 11 | 43°19'55" | 130°8'29" | 44.6 | 22.9 | 6.5 | 21.8 | 12.4 | 5.4 | 757 | 289 | 11 |
| 2 | 12 | 43°20'04" | 130°8'47" | 41.7 | 21.9 | 11  | 19.6 | 13.2 | 7.2 | 724 | 77  | 4  |
| 2 | 13 | 43°20'13" | 130°8'25" | 31.7 | 15.2 | 6.8 | 18.6 | 10.6 | 5.4 | 698 | 339 | 12 |
| 2 | 14 | 43°20'08" | 130°8'25" | 62.7 | 21   | 6.7 | 22.9 | 14.8 | 8.5 | 717 | 352 | 15 |
| 2 | 15 | 43°20'04" | 130°8'25" | 48.9 | 19.3 | 6.3 | 20.2 | 13.4 | 5   | 735 | 347 | 9  |
| 2 | 16 | 43°19'59" | 130°8'25" | 60.3 | 20.1 | 6.8 | 22.3 | 14.8 | 8.2 | 743 | 353 | 8  |
| 2 | 17 | 43°20'12" | 130°8'21" | 42.8 | 18.3 | 6.9 | 28.3 | 17.2 | 7.2 | 700 | 12  | 21 |
| 2 | 18 | 43°20'08" | 130°8'21" | 43.5 | 19.7 | 9.4 | 23.8 | 13.8 | 6.6 | 726 | 13  | 13 |
| 2 | 19 | 43°20'04" | 130°8'21" | 41.2 | 18.8 | 6.8 | 22.8 | 12.9 | 5.1 | 735 | 7   | 8  |

|   |    |           |           |      |      |     |      |      |     |     |     |    |
|---|----|-----------|-----------|------|------|-----|------|------|-----|-----|-----|----|
| 2 | 20 | 43°19'59" | 130°8'21" | 43   | 20.1 | 6.8 | 19.3 | 14.7 | 8.2 | 747 | 3   | 10 |
| 2 | 21 | 43°20'08" | 130°8'16" | 30.7 | 14.7 | 6   | 17.8 | 10.4 | 4.2 | 720 | 330 | 16 |
| 2 | 22 | 43°19'59" | 130°8'47" | 35.7 | 21   | 8.4 | 23.2 | 17.7 | 5.5 | 726 | 57  | 7  |
| 2 | 23 | 43°20'08" | 130°8'43" | 38.7 | 21.1 | 5.6 | 21.3 | 14.1 | 4.7 | 722 | 331 | 5  |
| 2 | 24 | 43°20'04" | 130°8'43" | 47.4 | 24.2 | 7.6 | 22.8 | 16.2 | 5.6 | 727 | 47  | 4  |
| 2 | 25 | 43°19'59" | 130°8'43" | 50.8 | 23.6 | 7   | 25.1 | 17.2 | 4.8 | 735 | 49  | 8  |
| 2 | 26 | 43°19'55" | 130°8'43" | 16.9 | 12.2 | 7.5 | 6.4  | 5.8  | 5.2 | 738 | 101 | 8  |
| 2 | 27 | 43°20'08" | 130°8'38" | 36.5 | 21.6 | 5.5 | 21.4 | 12.8 | 4.7 | 722 | 118 | 4  |
| 2 | 28 | 43°20'04" | 130°8'38" | 46.8 | 20.6 | 7   | 25.6 | 16   | 5.1 | 730 | 309 | 9  |

---

**Table S2.** Biomass equations and carbon content coefficients for ten species. The equations from two researches on logging down wood: (1) Li H.K.; Lei Y.C., 2010. Estimation and Evaluation of Forest Biomass Carbon Storage in China; China Forestry Publishing House: Beijing. (2) He H.J., 2018. Effects of Thinning Disturbance on Carbon Storage and Carbon Balance in Coniferous and Broad-leaved Mixed Forest in Jiaohe, Jilin Province. Beijing Forestry University.

| Species               | Equation for Aboveground biomass                                                                                                                                    | References        | Carbon Content |
|-----------------------|---------------------------------------------------------------------------------------------------------------------------------------------------------------------|-------------------|----------------|
| <i>A. fabri</i>       | $AGB = 0.067732 \times (D^2 \times H)^{0.865949}$                                                                                                                   | Li and Lei., 2010 | 0.4999         |
| <i>A. pictum</i>      | $AGB = 0.033474 \times (D^2 \times H)^{0.976}$                                                                                                                      | He, 2018          | 0.4834         |
| <i>B. costata</i>     | $AGB = 0.022846 \times (D^2 \times H)^{1.004}$                                                                                                                      | He, 2018          | 0.4914         |
| <i>B. platyphylla</i> | $AGB = 0.022846 \times (D^2 \times H)^{1.004}$                                                                                                                      | He, 2018          | 0.4914         |
| <i>F. mandshurica</i> | $AGB = 0.044 \times (D^2 \times H)^{0.9169} + 0.023 \times (D^2 \times H)^{0.7115} + 0.0104 \times (D^2 \times H)^{0.9994} + 0.0188 \times (D^2 \times H)^{0.8024}$ | Li and Lei., 2010 | 0.4956         |
| <i>L. gmelinii</i>    | $AGB = 0.046238 \times (D^2 \times H)^{0.905002}$                                                                                                                   | Li and Lei., 2010 | 0.5211         |
| <i>P. asperata</i>    | $AGB = 0.067732 \times (D^2 \times H)^{0.865949}$                                                                                                                   | Li and Lei., 2010 | 0.5208         |
| <i>P. koraiensis</i>  | $AGB = 0.027847 \times (D^2 \times H)^{0.956544}$                                                                                                                   | Li and Lei., 2010 | 0.5113         |
| <i>T. amurensis</i>   | $AGB = 0.0072121 \times (D^2 \times H)^{1.022}$                                                                                                                     | He, 2018          | 0.4392         |
| <i>U. davidiana</i>   | $AGB = 0.044 \times (D^2 \times H)^{0.9169} + 0.023 \times (D^2 \times H)^{0.7115} + 0.0104 \times (D^2 \times H)^{0.9994} + 0.0188 \times (D^2 \times H)^{0.8024}$ | Li and Lei., 2010 | 0.4834         |

**Table S3.** Fitting result of modeling base equation for single tree species.

| Species          | Model       | RMSE          | NMSE          | AIC            | BIC            |
|------------------|-------------|---------------|---------------|----------------|----------------|
| <i>A. fabri</i>  | BM.1        | 2.2049        | 2.2073        | 3038.45        | 3052.05        |
|                  | BM.2        | 2.2333        | 2.2359        | 3056.65        | 3070.25        |
|                  | <b>BM.3</b> | <b>2.2040</b> | <b>2.2064</b> | <b>3037.63</b> | <b>3051.23</b> |
|                  | BM.4        | 2.2321        | 2.2348        | 3054.30        | 3067.90        |
|                  | BM.5        | 2.3020        | 2.3048        | 3098.46        | 3112.05        |
|                  | BM.6        | 2.2223        | 2.2248        | 3049.73        | 3063.33        |
|                  | BM.7        | 2.3177        | 2.3210        | 3105.78        | 3119.37        |
|                  | BM.8        | 2.2448        | 2.2476        | 3062.16        | 3075.76        |
|                  | BM.9        | 2.2136        | 2.2161        | 3044.19        | 3057.79        |
|                  | BM.10       | 2.4005        | 2.4042        | 3153.67        | 3167.27        |
| <i>A. pictum</i> | BM.1        | 2.7131        | 2.7178        | 1472.08        | 1483.23        |
|                  | BM.2        | 2.7333        | 2.7380        | 1476.64        | 1487.79        |
|                  | BM.3        | 2.7075        | 2.7121        | 1470.77        | 1481.93        |
|                  | <b>BM.4</b> | <b>2.6994</b> | <b>2.7033</b> | <b>1468.85</b> | <b>1480.00</b> |
|                  | BM.5        | 2.8690        | 2.8770        | 1505.77        | 1516.92        |
|                  | BM.6        | 2.7248        | 2.7294        | 1474.74        | 1485.89        |
|                  | BM.7        | 2.7710        | 2.7721        | 1483.84        | 1494.99        |
|                  | BM.8        | 2.7068        | 2.7110        | 1470.55        | 1481.70        |
|                  | BM.9        | 2.7177        | 2.7221        | 1473.13        | 1484.28        |
|                  | BM.10       | 2.8653        | 2.8696        | 1504.19        | 1515.34        |

|                       |             |               |               |                |                |
|-----------------------|-------------|---------------|---------------|----------------|----------------|
| <i>B. costata</i>     | BM.1        | 3.3830        | 3.3415        | 1047.27        | 1057.15        |
|                       | <b>BM.2</b> | <b>3.3725</b> | <b>3.3297</b> | <b>1045.91</b> | <b>1055.79</b> |
|                       | BM.3        | 3.3889        | 3.3481        | 1048.04        | 1057.92        |
|                       | BM.4        | 3.3956        | 3.3561        | 1048.84        | 1058.72        |
|                       | BM.5        | 3.3966        | 3.3533        | 1048.46        | 1058.34        |
|                       | BM.6        | 3.3763        | 3.3340        | 1046.40        | 1056.28        |
|                       | BM.7        | 3.4802        | 3.4488        | 1059.39        | 1069.27        |
|                       | BM.8        | 3.4085        | 3.3704        | 1050.60        | 1060.48        |
|                       | BM.9        | 3.3806        | 3.3387        | 1046.94        | 1056.82        |
|                       | BM.10       | 3.5631        | 3.5375        | 1069.07        | 1078.95        |
| <i>B. platyphylla</i> | BM.1        | 3.0123        | 3.0798        | 365.97         | 372.80         |
|                       | BM.2        | 3.0106        | 3.0770        | 365.98         | 372.81         |
|                       | BM.3        | 3.0137        | 3.0816        | 366.00         | 372.83         |
|                       | BM.4        | 3.0191        | 3.1012        | 366.06         | 372.89         |
|                       | BM.5        | 3.0438        | 3.1363        | 367.50         | 374.33         |
|                       | BM.6        | 3.0107        | 3.0768        | 365.97         | 372.80         |
|                       | BM.7        | 3.0448        | 3.1004        | 367.16         | 373.99         |
|                       | BM.8        | 3.0201        | 3.0882        | 366.18         | 373.01         |
|                       | <b>BM.9</b> | <b>3.0109</b> | <b>3.0768</b> | <b>365.97</b>  | <b>372.80</b>  |
|                       | BM.10       | 3.0792        | 3.1283        | 368.47         | 375.30         |
| <i>F. mandshurica</i> | <b>BM.1</b> | <b>3.7752</b> | <b>3.7637</b> | <b>255.19</b>  | <b>260.68</b>  |
|                       | BM.2        | 3.7812        | 3.7760        | 255.39         | 260.88         |

|                    |             |               |               |               |               |
|--------------------|-------------|---------------|---------------|---------------|---------------|
|                    | BM.3        | 3.7789        | 3.7641        | 255.24        | 260.73        |
|                    | BM.4        | 3.8056        | 3.7847        | 255.68        | 261.16        |
|                    | BM.5        | 3.8364        | 3.8597        | 256.82        | 262.31        |
|                    | BM.6        | 3.7772        | 3.7706        | 255.30        | 260.79        |
|                    | BM.7        | 3.8622        | 3.8247        | 256.93        | 262.41        |
|                    | BM.8        | 3.8109        | 3.7851        | 255.84        | 261.32        |
|                    | BM.9        | 3.7744        | 3.7664        | 255.24        | 260.73        |
|                    | BM.10       | 3.9314        | 3.8854        | 258.32        | 263.81        |
| <i>L. gmelinii</i> | BM.1        | 3.1670        | 3.0374        | 196.74        | 201.65        |
|                    | BM.2        | 3.1729        | 3.0441        | 196.96        | 201.88        |
|                    | <b>BM.3</b> | <b>3.1654</b> | <b>3.0356</b> | <b>196.66</b> | <b>201.57</b> |
|                    | BM.4        | 3.1781        | 3.0416        | 196.56        | 201.47        |
|                    | BM.5        | 3.2915        | 3.1357        | 199.27        | 204.18        |
|                    | BM.6        | 3.1700        | 3.0416        | 196.89        | 201.81        |
|                    | BM.7        | 3.1790        | 3.0569        | 196.91        | 201.82        |
|                    | BM.8        | 3.1664        | 3.0365        | 196.53        | 201.44        |
|                    | BM.9        | 3.1674        | 3.0393        | 196.83        | 201.74        |
|                    | BM.10       | 3.2196        | 3.1007        | 197.79        | 202.70        |
| <i>P. asperata</i> | BM.1        | 2.8691        | 2.8667        | 1513.65       | 1524.82       |
|                    | BM.2        | 2.8439        | 2.8397        | 1508.20       | 1519.37       |
|                    | BM.3        | 2.8938        | 2.8921        | 1518.91       | 1530.08       |
|                    | BM.4        | 2.9324        | 2.9317        | 1527.22       | 1538.39       |

|                      |             |               |               |                |                |
|----------------------|-------------|---------------|---------------|----------------|----------------|
|                      | <b>BM.5</b> | <b>2.8463</b> | <b>2.8385</b> | <b>1508.04</b> | <b>1519.21</b> |
|                      | BM.6        | 2.8464        | 2.8426        | 1508.76        | 1519.93        |
|                      | BM.7        | 3.2421        | 3.2413        | 1588.10        | 1599.27        |
|                      | BM.8        | 2.9994        | 2.9985        | 1540.94        | 1552.12        |
|                      | BM.9        | 2.8510        | 2.8477        | 1509.79        | 1520.96        |
|                      | BM.10       | 3.5153        | 3.5143        | 1636.76        | 1647.93        |
| <i>P. koraiensis</i> | <b>BM.1</b> | <b>2.4229</b> | <b>2.3969</b> | <b>1424.70</b> | <b>1435.91</b> |
|                      | BM.2        | 2.4376        | 2.4126        | 1428.66        | 1439.87        |
|                      | BM.3        | 2.4259        | 2.3995        | 1425.41        | 1436.62        |
|                      | BM.4        | 2.4327        | 2.4079        | 1427.10        | 1438.31        |
|                      | BM.5        | 2.5830        | 2.5639        | 1466.31        | 1477.52        |
|                      | BM.6        | 2.4301        | 2.4048        | 1426.70        | 1437.91        |
|                      | BM.7        | 2.6398        | 2.6081        | 1477.83        | 1489.04        |
|                      | BM.8        | 2.4663        | 2.4383        | 1435.56        | 1446.77        |
|                      | BM.9        | 2.4250        | 2.3995        | 1425.37        | 1436.58        |
|                      | BM.10       | 2.8651        | 2.8320        | 1528.57        | 1539.78        |
| <i>T. amurensis</i>  | BM.1        | 2.7669        | 2.7565        | 2594.35        | 2607.19        |
|                      | BM.2        | 2.7883        | 2.7761        | 2602.12        | 2614.95        |
|                      | BM.3        | 2.7615        | 2.7519        | 2592.50        | 2605.34        |
|                      | <b>BM.4</b> | <b>2.7554</b> | <b>2.7471</b> | <b>2590.30</b> | <b>2603.14</b> |
|                      | BM.5        | 2.9096        | 2.8931        | 2645.39        | 2658.22        |
|                      | BM.6        | 2.7798        | 2.7682        | 2599.03        | 2611.86        |

|                     |             |               |               |               |               |
|---------------------|-------------|---------------|---------------|---------------|---------------|
|                     | BM.7        | 2.8240        | 2.8171        | 2617.82       | 2630.65       |
|                     | BM.8        | 2.7635        | 2.7556        | 2593.98       | 2606.81       |
|                     | BM.9        | 2.7727        | 2.7616        | 2596.45       | 2609.29       |
|                     | BM.10       | 2.9192        | 2.9118        | 2653.03       | 2665.87       |
| <i>U. davidiana</i> | BM.1        | 3.2282        | 3.2895        | 449.80        | 457.17        |
|                     | BM.2        | 3.2329        | 3.2972        | 450.26        | 457.63        |
|                     | <b>BM.3</b> | <b>3.2288</b> | <b>3.2886</b> | <b>449.73</b> | <b>457.09</b> |
|                     | BM.4        | 3.2332        | 3.2909        | 449.60        | 456.97        |
|                     | BM.5        | 3.3420        | 3.4126        | 455.79        | 463.16        |
|                     | BM.6        | 3.2293        | 3.2931        | 450.04        | 457.40        |
|                     | BM.7        | 3.3291        | 3.3764        | 453.71        | 461.07        |
|                     | BM.8        | 3.2415        | 3.2971        | 450.02        | 457.39        |
|                     | BM.9        | 3.2269        | 3.2903        | 449.87        | 457.23        |
|                     | BM.10       | 3.4568        | 3.4935        | 458.90        | 466.26        |

---



**Table S4.** Fitting results of the generalized H-D models for all reparametrized form. n.c. indicates lack of convergence for model fitting. n.s. indicates that the parameters of the model were not significantly ( $p < 0.05$ ).

| Additional variables | Model               | Parameter                                            | RMSE          | CV-MSE        | AIC             | BIC             |
|----------------------|---------------------|------------------------------------------------------|---------------|---------------|-----------------|-----------------|
| Null                 | BM.9                |                                                      | 2.8785        | 2.8635        | 12754.90        | 12772.47        |
| Stand level          | SIC (Topography)    | $\beta 1$                                            | n.c.          | n.c.          | n.c.            | n.c.            |
|                      |                     | $\beta 2$                                            | n.c.          | n.c.          | n.c.            | n.c.            |
|                      |                     | $\beta 1$ and $\beta 2$                              | n.c.          | n.c.          | n.c.            | n.c.            |
|                      | CE (Topography)     | $\beta 1$                                            | 2.8559        | 2.8611        | 12752.70        | 12776.12        |
|                      |                     | <b><math>\beta 2</math></b>                          | <b>2.8537</b> | <b>2.8588</b> | <b>12749.62</b> | <b>12773.04</b> |
|                      |                     | $\beta 1$ and $\beta 2$                              | 2.8569        | 2.8599        | 12751.14        | 12780.42        |
|                      | BA (Competition)    | $\beta 1$                                            | 2.8373        | 2.8476        | 12730.71        | 12754.13        |
|                      |                     | <b><math>\beta 2</math></b>                          | <b>2.8387</b> | <b>2.8424</b> | <b>12721.31</b> | <b>12744.74</b> |
|                      |                     | $\beta 1$ and $\beta 2$                              | n.s.          | n.s.          | n.s.            | n.s.            |
|                      | DMH (Site quality)  | $\beta 1$                                            | 2.7245        | 2.7245        | 12501.81        | 12525.23        |
|                      |                     | $\beta 2$                                            | 2.7722        | 2.7745        | 12595.60        | 12619.03        |
|                      |                     | <b><math>\beta 1</math> and <math>\beta 2</math></b> | <b>2.7188</b> | <b>2.7208</b> | <b>12493.77</b> | <b>12523.05</b> |
| Species level        | PC (Function Trait) | $\beta 1$                                            | 2.8507        | 2.8563        | 12744.21        | 12767.64        |
|                      |                     | $\beta 2$                                            | 2.8369        | 2.8438        | 12720.67        | 12744.09        |
|                      |                     | <b><math>\beta 1</math> and <math>\beta 2</math></b> | <b>2.8304</b> | <b>2.8374</b> | <b>12709.06</b> | <b>12738.34</b> |
|                      | LA (Function Trait) | $\beta 1$                                            | 2.8546        | 2.8604        | 12751.56        | 12774.98        |
|                      |                     | $\beta 2$                                            | 2.8405        | 2.8474        | 12727.93        | 12751.36        |
|                      |                     | <b><math>\beta 1</math> and <math>\beta 2</math></b> | <b>2.8386</b> | <b>2.8327</b> | <b>12701.33</b> | <b>12730.61</b> |

|                  |                       |                                                      |               |               |                 |                 |
|------------------|-----------------------|------------------------------------------------------|---------------|---------------|-----------------|-----------------|
| Individual level | LT (Function Trait)   | $\beta 1$                                            | 2.8563        | 2.8606        | 12753.52        | 12776.95        |
|                  |                       | <b><math>\beta 2</math></b>                          | <b>2.8555</b> | <b>2.8602</b> | <b>12752.62</b> | <b>12776.04</b> |
|                  |                       | $\beta 1$ and $\beta 2$                              | n.s.          | n.s.          | n.s.            | n.s.            |
|                  | LDMC (Function Trait) | $\beta 1$                                            | 2.8568        | 2.8622        | 12754.96        | 12778.39        |
|                  |                       | $\beta 2$                                            | 2.8572        | 2.8633        | 12756.23        | 12779.65        |
|                  |                       | <b><math>\beta 1</math> and <math>\beta 2</math></b> | <b>2.8461</b> | <b>2.8523</b> | <b>12737.25</b> | <b>12766.53</b> |
|                  | SLA (Function Trait)  | $\beta 1$                                            | 2.8555        | 2.8613        | 12753.48        | 12776.90        |
|                  |                       | $\beta 2$                                            | 2.8432        | 2.8502        | 12733.08        | 12756.50        |
|                  |                       | <b><math>\beta 1</math> and <math>\beta 2</math></b> | <b>2.8281</b> | <b>2.8348</b> | <b>12705.77</b> | <b>12735.05</b> |
|                  | LN (Function Trait)   | $\beta 1$                                            | 2.8471        | 2.8531        | 12737.95        | 12761.37        |
|                  |                       | $\beta 2$                                            | 2.8315        | 2.8388        | 12710.99        | 12734.42        |
|                  |                       | <b><math>\beta 1</math> and <math>\beta 2</math></b> | <b>2.8259</b> | <b>2.8332</b> | <b>12700.92</b> | <b>12730.20</b> |
|                  | WD (Function Trait)   | $\beta 1$                                            | 2.8209        | 2.8258        | 12689.90        | 12713.32        |
|                  |                       | <b><math>\beta 2</math></b>                          | <b>2.8085</b> | <b>2.8147</b> | <b>12668.83</b> | <b>12692.25</b> |
|                  |                       | $\beta 1$ and $\beta 2$                              | n.s.          | n.s.          | n.s.            | n.s.            |
|                  | Hmax (Function Trait) | $\beta 1$                                            | 2.8130        | 2.8185        | 12676.18        | 12699.61        |
|                  |                       | <b><math>\beta 2</math></b>                          | <b>2.8000</b> | <b>2.8048</b> | <b>12651.05</b> | <b>12674.47</b> |
|                  |                       | $\beta 1$ and $\beta 2$                              | n.s.          | n.s.          | n.s.            | n.s.            |
|                  | BAL (Competition)     | $\beta 1$                                            | 2.8519        | 2.8560        | 12744.82        | 12768.24        |
|                  |                       | <b><math>\beta 2</math></b>                          | <b>2.8488</b> | <b>2.8529</b> | <b>12739.78</b> | <b>12763.20</b> |
|                  |                       | $\beta 1$ and $\beta 2$                              | n.s.          | n.s.          | n.s.            | n.s.            |

---
